# Supplementary material
Source: PubMed Central journal article supplement (PMC7967794)
Supplement: dey356_supplement_table1.pdf [file dey356_supplement_table1.pdf]

**Supplementary Table S1 Interaction of obesity status with NEFA parameters with respect to insulin sensitivity ( $S_i$ ).**

| Dependent variable | Independent variable                                  | $\beta$ coefficient $\pm$ SE | P-value       | $R^2$ |
|--------------------|-------------------------------------------------------|------------------------------|---------------|-------|
| log $S_i$          | Group (obese and nonobese) $\times$ NEFA <sub>0</sub> | -0.001 $\pm$ 0.001           | <b>0.0001</b> | 30.1  |
|                    | NEFA <sub>0</sub>                                     | 0.001 $\pm$ 0.001            | 0.1701        |       |
|                    | Group (obese and nonobese)                            | -0.437 $\pm$ 0.084           | <b>0.0001</b> |       |
| log $S_i$          | Group (obese and nonobese) $\times$ $g_s$             | -0.039 $\pm$ 0.009           | <b>0.0001</b> | 31.5  |
|                    | $g_s$                                                 | 0.008 $\pm$ 0.013            | 0.5372        |       |
|                    | Group (obese and nonobese)                            | -0.421 $\pm$ 0.081           | <b>0.0001</b> |       |
| log $S_i$          | Group (obese and nonobese) $\times$ log $K_C$         | 0.291 $\pm$ 0.058            | <b>0.0001</b> | 43.3  |
|                    | log $K_C$                                             | 0.111 $\pm$ 0.168            | 0.5145        |       |
|                    | Group (obese and nonobese)                            | -0.373 $\pm$ 0.084           | <b>0.0001</b> |       |
| log $S_i$          | Group (obese and nonobese) $\times$ latency           | -0.029 $\pm$ 0.007           | <b>0.0001</b> | 25.9  |
|                    | Latency                                               | 0.002 $\pm$ 0.009            | 0.839         |       |
|                    | Group (obese and nonobese)                            | -0.436 $\pm$ 0.078           | <b>0.0001</b> |       |
| log $S_i$          | Group (obese and nonobese) $\times$ log $\Phi$        | -1.556 $\pm$ 0.476           | <b>0.0019</b> | 17.8  |
|                    | log $\Phi$                                            | 1.0292 $\pm$ 0.450           | 0.0261        |       |
|                    | Group (obese and nonobese)                            | -0.434 $\pm$ 0.079           | <b>0.0001</b> |       |
| log $S_i$          | Group (obese and nonobese) $\times$ $S_{FFA}$         | -0.005 $\pm$ 0.001           | <b>0.0001</b> | 29.2  |
|                    | $S_{FFA}$                                             | 0.002 $\pm$ 0.001            | 0.056         |       |
|                    | Group (obese and nonobese)                            | -0.435 $\pm$ 0.080           | <b>0.0001</b> |       |
| log $S_i$          | Group (obese and nonobese) $\times$ $K_{FFA}$         | -3.463 $\pm$ 1.061           | <b>0.0019</b> | 27.1  |
|                    | $K_{FFA}$                                             | 2.551 $\pm$ 1.106            | 0.0249        |       |
|                    | Group (obese and nonobese)                            | -0.384 $\pm$ 0.085           | <b>0.0001</b> |       |

Diagnostic group was coded as obese = 1 and nonobese = 0.  
See text for key to abbreviations.
