# Supplementary material
Source: PubMed Central journal article supplement (PMC7967794)
Supplement: dey356_supplement_table2.pdf [file dey356_supplement_table2.pdf]

**Supplementary Table SII Interaction of mF-G score with diagnostic group with respect to NEFA parameters.**

| Dependent variables                 | Independent variables                | $\beta$ coefficient $\pm$ SE | P-value | R <sup>2</sup> |
|-------------------------------------|--------------------------------------|------------------------------|---------|----------------|
| NEFA <sub>0</sub> ( $\mu$ mol/l)    | Diagnostic group $\times$ mF-G score | $-0.039 \pm 0.026$           | 0.137   | 5.3            |
|                                     | mF-G score                           | $0.038 \pm 0.029$            | 0.185   |                |
|                                     | Diagnostic group                     | $-0.093 \pm 0.062$           | 0.14    |                |
| g <sub>s</sub> (mmol/l)             | Diagnostic group $\times$ mF-G score | $0.035 \pm 0.030$            | 0.248   | 6.8            |
|                                     | mF-G score                           | $-0.029 \pm 0.033$           | 0.385   |                |
|                                     | Diagnostic group                     | $0.081 \pm 0.072$            | 0.262   |                |
| log K <sub>C</sub> (%/min)          | Diagnostic group $\times$ mF-G score | $-0.051 \pm 0.039$           | 0.199   | 4.8            |
|                                     | mF-G score                           | $0.047 \pm 0.042$            | 0.272   |                |
|                                     | Diagnostic group                     | $-0.140 \pm 0.091$           | 0.132   |                |
| Latency ( $\tau$ ) (min)            | Diagnostic group $\times$ mF-G score | $-0.010 \pm 0.034$           | 0.771   | 0.18           |
|                                     | mF-G score                           | $0.010 \pm 0.037$            | 0.789   |                |
|                                     | Diagnostic group                     | $-0.033 \pm 0.080$           | 0.679   |                |
| log $\Phi$ (mmol/l)                 | Diagnostic group $\times$ mF-G score | $-0.066 \pm 0.067$           | 0.332   | 4.9            |
|                                     | mF-G score                           | $0.054 \pm 0.073$            | 0.467   |                |
|                                     | Diagnostic group                     | $-0.161 \pm 0.158$           | 0.313   |                |
| S <sub>FFA</sub> ( $\mu$ mol/l/min) | Diagnostic group $\times$ mF-G score | $0.002 \pm 0.034$            | 0.948   | 0.4            |
|                                     | mF-G score                           | $0.001 \pm 0.037$            | 0.987   |                |
|                                     | Diagnostic group                     | $0.027 \pm 0.081$            | 0.744   |                |
| K <sub>FFA</sub> (%/min)            | Diagnostic group $\times$ mF-G score | $0.002 \pm 0.034$            | 0.406   | 1.6            |
|                                     | mF-G score                           | $0.001 \pm 0.037$            | 0.376   |                |
|                                     | Diagnostic group                     | $0.003 \pm 0.072$            | 0.971   |                |

Diagnostic group was coded as PCOS = 1 and Control = 0.

See text for key to abbreviations.
