# Supplementary material
Source: PubMed Central journal article supplement (PMC7967794)
Supplement: dey356_supplement_table3.pdf [file dey356_supplement_table3.pdf]

**Supplementary Table SIII Interaction of free T with diagnostic group with respect to NEFA parameters.**

| Dependent variables                 | Independent variables            | $\beta$ coefficient $\pm$ SE | P-value      | R <sup>2</sup> |
|-------------------------------------|----------------------------------|------------------------------|--------------|----------------|
| NEFA <sub>0</sub> ( $\mu$ mol/l)    | Diagnostic group $\times$ free T | $-0.023 \pm 0.014$           | 0.098        | 10.0           |
|                                     | Free T                           | $0.022 \pm 0.014$            | 0.13         |                |
|                                     | Diagnostic group                 | $-0.052 \pm 0.055$           | 0.352        |                |
| g <sub>s</sub> (mmol/l)             | Diagnostic group $\times$ free T | $0.018 \pm 0.017$            | 0.307        | 2.9            |
|                                     | Free T                           | $-0.017 \pm 0.018$           | 0.334        |                |
|                                     | Diagnostic group                 | $0.126 \pm 0.065$            | 0.061        |                |
| log K <sub>C</sub> (%/min)          | Diagnostic group $\times$ free T | $-0.025 \pm 0.022$           | 0.244        | 3.5            |
|                                     | Free T                           | $0.027 \pm 0.022$            | 0.225        |                |
|                                     | Diagnostic group                 | $-0.207 \pm 0.08$            | <b>0.013</b> |                |
| Latency ( $\tau$ ) (min)            | Diagnostic group $\times$ free T | $-0.022 \pm 0.018$           | 0.228        | 3.6            |
|                                     | Free T                           | $0.024 \pm 0.019$            | 0.21         |                |
|                                     | Diagnostic group                 | $-0.062 \pm 0.072$           | 0.397        |                |
| log $\theta$ (mmol/l)               | Diagnostic group $\times$ free T | $-0.071 \pm 0.035$           | <b>0.049</b> | 9.6            |
|                                     | Free T                           | $0.070 \pm 0.036$            | 0.06         |                |
|                                     | Diagnostic group                 | $-0.256 \pm 0.138$           | 0.069        |                |
| S <sub>FFA</sub> ( $\mu$ mol/l/min) | Diagnostic group $\times$ free T | $0.010 \pm 0.019$            | 0.56         | 1.0            |
|                                     | Free T                           | $-0.011 \pm 0.019$           | 0.571        |                |
|                                     | Diagnostic group                 | $0.089 \pm 0.072$            | 0.225        |                |
| K <sub>FFA</sub> (%/min)            | Diagnostic group $\times$ free T | $0.008 \pm 0.017$            | 0.64         | 5.4            |
|                                     | Free T                           | $-0.006 \pm 0.017$           | 0.741        |                |
|                                     | Diagnostic group                 | $-0.025 \pm 0.065$           | 0.705        |                |
