# Supplementary material
Source: PubMed Central journal article supplement (PMC7967794)
Supplement: dey356_supplement_table4.pdf [file dey356_supplement_table4.pdf]

**Supplementary Table SIV Interaction of total T with diagnostic group with respect to NEFA parameters**

| Dependent variables                 | Independent variables             | $\beta$ coefficient $\pm$ SE | P-value       | R <sup>2</sup> |
|-------------------------------------|-----------------------------------|------------------------------|---------------|----------------|
| NEFA <sub>0</sub> ( $\mu$ mol/l)    | Diagnostic group $\times$ total T | $-0.002 \pm 0.001$           | 0.073         | 13.9           |
|                                     | Total T                           | $0.002 \pm 0.001$            | 0.15          |                |
|                                     | Diagnostic group                  | $-0.038 \pm 0.055$           | 0.486         |                |
| g <sub>s</sub> (mmol/l)             | Diagnostic group $\times$ total T | $0.002 \pm 0.002$            | 0.135         | 4.7            |
|                                     | Total T                           | $-0.002 \pm 0.002$           | 0.157         |                |
|                                     | Diagnostic group                  | $0.134 \pm 0.065$            | <b>0.0449</b> |                |
| log K <sub>C</sub> (%/min)          | Diagnostic group $\times$ total T | $-0.003 \pm 0.002$           | 0.148         | 4.9            |
|                                     | Total T                           | $0.003 \pm 0.002$            | 0.126         |                |
|                                     | Diagnostic group                  | $-0.207 \pm 0.080$           | <b>0.0127</b> |                |
| Latency ( $\tau$ ) (min)            | Diagnostic group $\times$ total T | $-0.002 \pm 0.002$           | 0.359         | 4.4            |
|                                     | Total T                           | $0.002 \pm 0.002$            | 0.275         |                |
|                                     | Diagnostic group                  | $-0.084 \pm 0.071$           | 0.2408        |                |
| log $\Phi$ (mmol/l)                 | Diagnostic group $\times$ total T | $-0.007 \pm 0.003$           | <b>0.026</b>  | 10.3           |
|                                     | Total T                           | $0.007 \pm 0.003$            | <b>0.036</b>  |                |
|                                     | Diagnostic group                  | $-0.287 \pm 0.137$           | <b>0.0422</b> |                |
| S <sub>FFA</sub> ( $\mu$ mol/l/min) | Diagnostic group $\times$ total T | $0.001 \pm 0.002$            | 0.965         | 2.5            |
|                                     | Total T                           | $-0.001 \pm 0.002$           | 0.827         |                |
|                                     | Diagnostic group                  | $0.114 \pm 0.071$            | 0.1137        |                |
| K <sub>FFA</sub> (%/min)            | Diagnostic group $\times$ total T | $-0.001 \pm 0.002$           | 0.761         | 5.7            |
|                                     | Total T                           | $0.001 \pm 0.002$            | 0.57          |                |
|                                     | Diagnostic group                  | $-0.027 \pm 0.065$           | 0.6739        |                |
