# Supplementary material
Source: PubMed Central journal article supplement (PMC7967794)
Supplement: dey356_supplement_table5.pdf [file dey356_supplement_table5.pdf]

**Supplementary Table SV Interaction of DHEAS with diagnostic group with respect to NEFA parameters.**

| Dependent variables                 | Independent variables           | $\beta$ coefficient $\pm$ SE | P-value      | R <sup>2</sup> |
|-------------------------------------|---------------------------------|------------------------------|--------------|----------------|
| NEFA <sub>0</sub> ( $\mu$ mol/l)    | Diagnostic group $\times$ DHEAS | 0.001 $\pm$ 0.001            | 0.894        | 0.1            |
|                                     | DHEAS                           | -0.001 $\pm$ 0.001           | 0.959        |                |
|                                     | Diagnostic group                | -0.079 $\pm$ 0.050           | 0.121        |                |
| g <sub>s</sub> (mmol/l)             | Diagnostic group $\times$ DHEAS | 0.001 $\pm$ 0.001            | <b>0.045</b> | 8              |
|                                     | DHEAS                           | -0.001 $\pm$ 0.001           | 0.126        |                |
|                                     | Diagnostic group                | 0.113 $\pm$ 0.058            | 0.057        |                |
| log K <sub>C</sub> (%/min)          | Diagnostic group $\times$ DHEAS | -0.001 $\pm$ 0.001           | 0.065        | 6.8            |
|                                     | DHEAS                           | 0.001 $\pm$ 0.001            | 0.148        |                |
|                                     | Diagnostic group                | -0.127 $\pm$ 0.076           | 0.101        |                |
| Latency ( $\tau$ ) (min)            | Diagnostic group $\times$ DHEAS | -0.001 $\pm$ 0.001           | 0.544        | 2.2            |
|                                     | DHEAS                           | -0.001 $\pm$ 0.001           | 0.984        |                |
|                                     | Diagnostic group                | -0.011 $\pm$ 0.066           | 0.86         |                |
| log $\Phi$ (mmol/l)                 | Diagnostic group $\times$ DHEAS | -0.001 $\pm$ 0.001           | 0.327        | 2.8            |
|                                     | DHEAS                           | 0.001 $\pm$ 0.001            | 0.684        |                |
|                                     | Diagnostic group                | -0.214 $\pm$ 0.130           | 0.107        |                |
| S <sub>FFA</sub> ( $\mu$ mol/l/min) | Diagnostic group $\times$ DHEAS | 0.003 $\pm$ 0.001            | 0.243        | 5.1            |
|                                     | DHEAS                           | -0.001 $\pm$ 0.001           | 0.78         |                |
|                                     | Diagnostic group                | 0.028 $\pm$ 0.066            | 0.675        |                |
| K <sub>FFA</sub> (%/min)            | Diagnostic group $\times$ DHEAS | -0.002 $\pm$ 0.001           | 0.466        | 1.1            |
|                                     | DHEAS                           | 0.001 $\pm$ 0.001            | 0.511        |                |
|                                     | Diagnostic group                | 0.027 $\pm$ 0.060            | 0.658        |                |
