# Supplementary material
Source: PubMed Central journal article supplement (PMC7967794)
Supplement: dey356s_supplement_figure1.pdf [file dey356s_supplement_figure1.pdf]

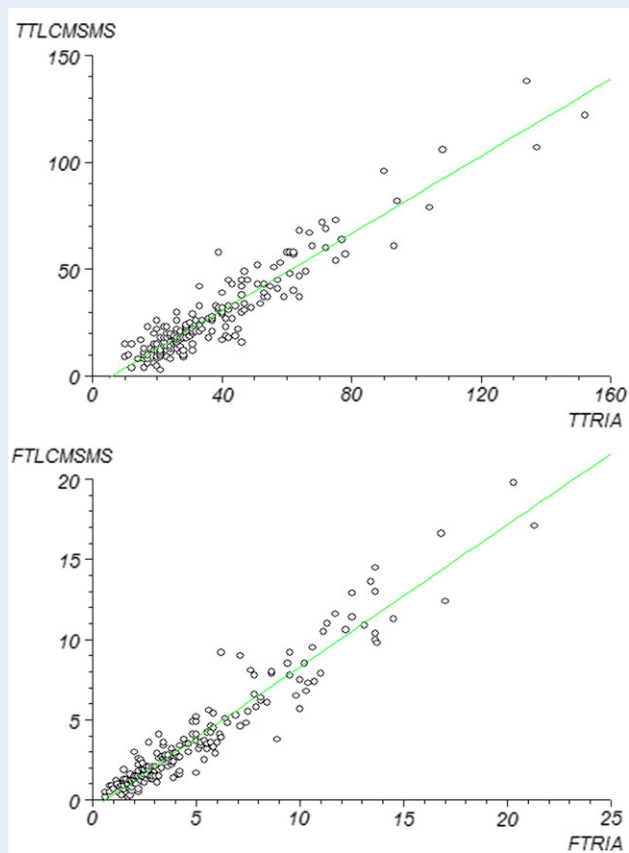

**Supplementary Figure S1** Correlation between total T and free T results obtained with LC-MS/MS and extraction, chromatography and radioimmunoassay (RIA). Plasma free and total T levels were analyzed by extraction, chromatography and RIA in eight patients and converted to LC-MS/MS values. Simple linear regression between RIA and LC-MS/MS values revealed a Pearson's correlation coefficient ( $r$ ) of 0.94 (95% CI for  $r$  (Fisher's  $z$  transformed): 0.92–0.96) and an  $r^2 = 0.89$  for TT and an  $r = 0.96$  (95% CI: 0.95–0.97) and an  $r^2 = 0.92$  for FT, and the following conversion equations: (a)  $TTLC-MS/MS = 0.902101$  and  $TTRIA = -5.343319$  and (b)  $FTLC-MS/MS = 0.885808$  and  $FTRIA = -0.556772$ .
